# Supplementary material for: Structures and electronic properties of exohedral metalloborospherenes Al12Li20&B60 and Al20Li12&B60 and their endohedral systems: push electron oxidation of super-reduced polyanionic states B6050− and B6060−
Source: Royal Society of Chemistry journal article supplement (doi:10.1039/d4nj02251c), 2024-01-01
Supplement: d4nj02251c1.pdf [file d4nj02251c1.pdf]

# **Structures and Electronic Properties of Exohedral Metalloborosphenes $\text{Al}_{12}\text{Li}_{20}\&\text{B}_{60}$ and $\text{Al}_{20}\text{Li}_{12}\&\text{B}_{60}$ and Their Endohedral Systems: Push Electron Oxidation of Super-reduced Polyanionic States $\text{B}_{60}^{50-}$ and $\text{B}_{60}^{60-}$**

Weihong Chen,<sup>a</sup> Jiayuan Liu,<sup>b</sup> Weiming Sun,<sup>c</sup> Shansheng Yu,<sup>\*a</sup>, Ying Li<sup>d</sup>, and Zhiru Li<sup>\*d</sup>

<sup>a</sup> Key Laboratory of Automobile Materials of MOE and Department of Materials Science, Jilin University, Changchun, 130012, China

<sup>b</sup> Institute of Applied Chemistry, Hebei North University, Zhangjiakou, 075000, China

<sup>c</sup> Department of Basic Chemistry, The School of Pharmacy, Fujian Medical University, Fuzhou, 350108, China

<sup>d</sup> Laboratory of Theoretical and Computational Chemistry, Institute of Theoretical Chemistry, College of Chemistry, Jilin University, Changchun, 130023, China

Corresponding Authors

E-mail: yuss@jlu.edu.cn (Shansheng Yu)

E-mail: lzh@jlu.edu.cn (Zhiru Li)

Table S1. The symmetry, B-B bond length shared between a five- and a six-membered ring ( $d_{5-6}$ , in Å), B-B bond length shared between two six-membered rings ( $d_{6-6}$ , in Å), B-Al bond length ( $d_{\text{B-Al}}$ , in Å), B-Li bond length ( $d_{\text{B-Li}}$ , in Å), B<sub>60</sub> cage diameter ( $D$ , in Å) for Al<sub>12</sub>Li<sub>20</sub>&B<sub>60</sub> at different levels of theory.

| Level          | Symm  | $d_{5-6}$ | $d_{6-6}$ | $d_{\text{B-Al}}$ | $d_{\text{B-Li}}$ | $D$ |
|----------------|-------|-----------|-----------|-------------------|-------------------|-----|
| PBE0/6-31G(d)  | $I_h$ | 1.788     | 1.673     | 2.125             | 2.207             | 8.5 |
| PBE0/6-311G(d) | $I_h$ | 1.785     | 1.669     | 2.124             | 2.202             | 8.5 |
| TPSSH/6-31G(d) | $I_h$ | 1.793     | 1.675     | 2.133             | 2.219             | 8.5 |
| B3LYP/6-31G(d) | $I_h$ | 1.790     | 1.677     | 2.140             | 2.203             | 8.5 |

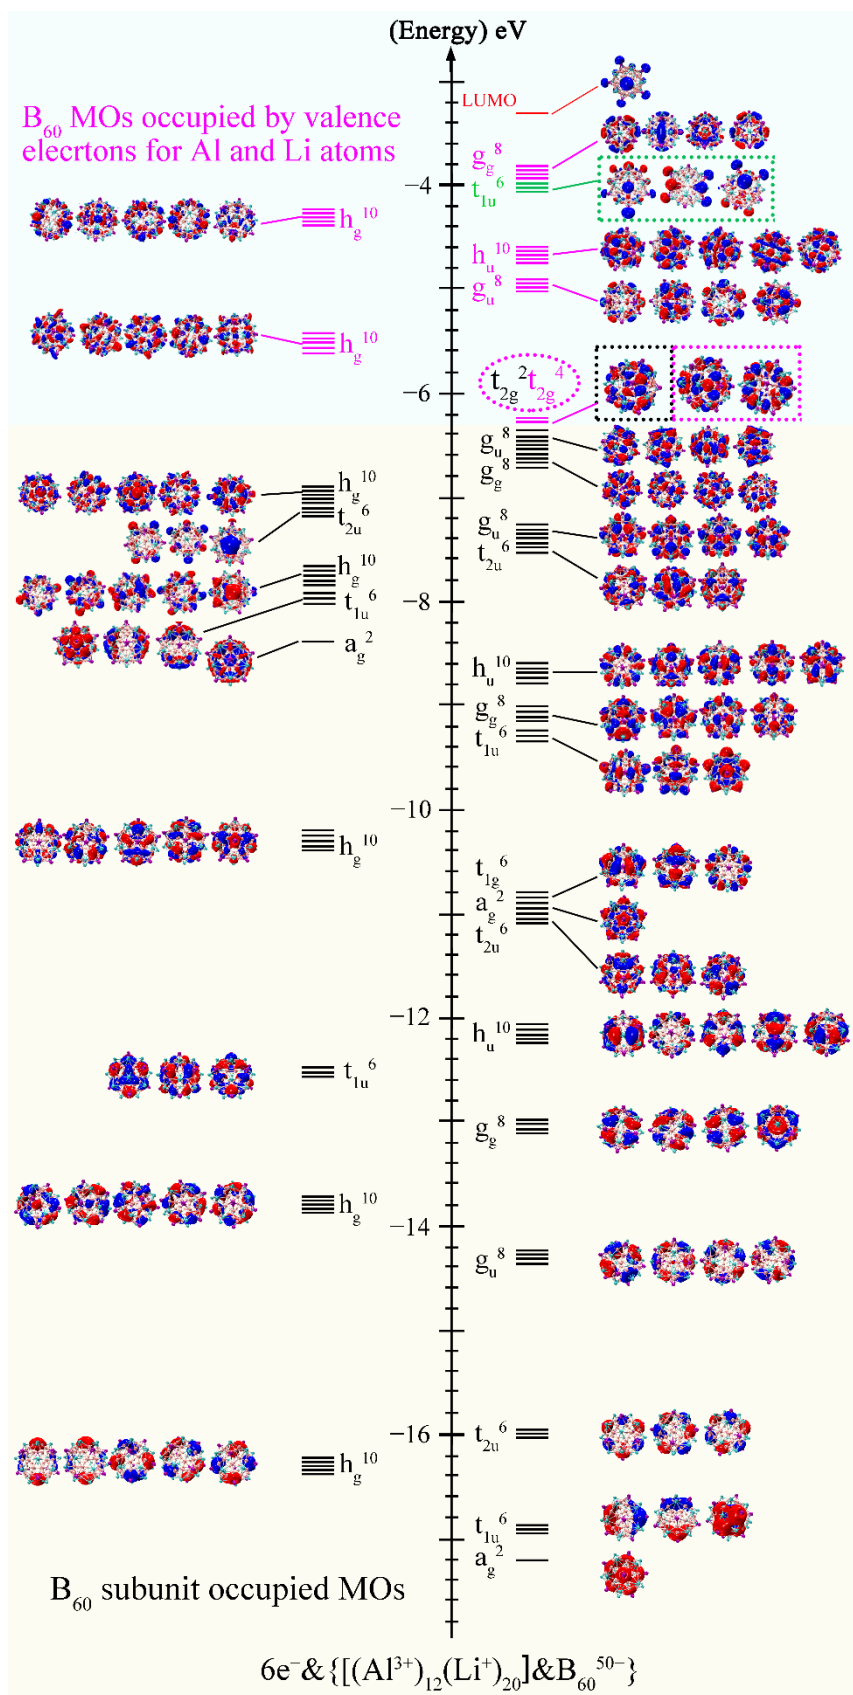

Figure S1. The complete molecular orbital energy diagram of  $Al_{12}Li_{20}B_{60}$ .

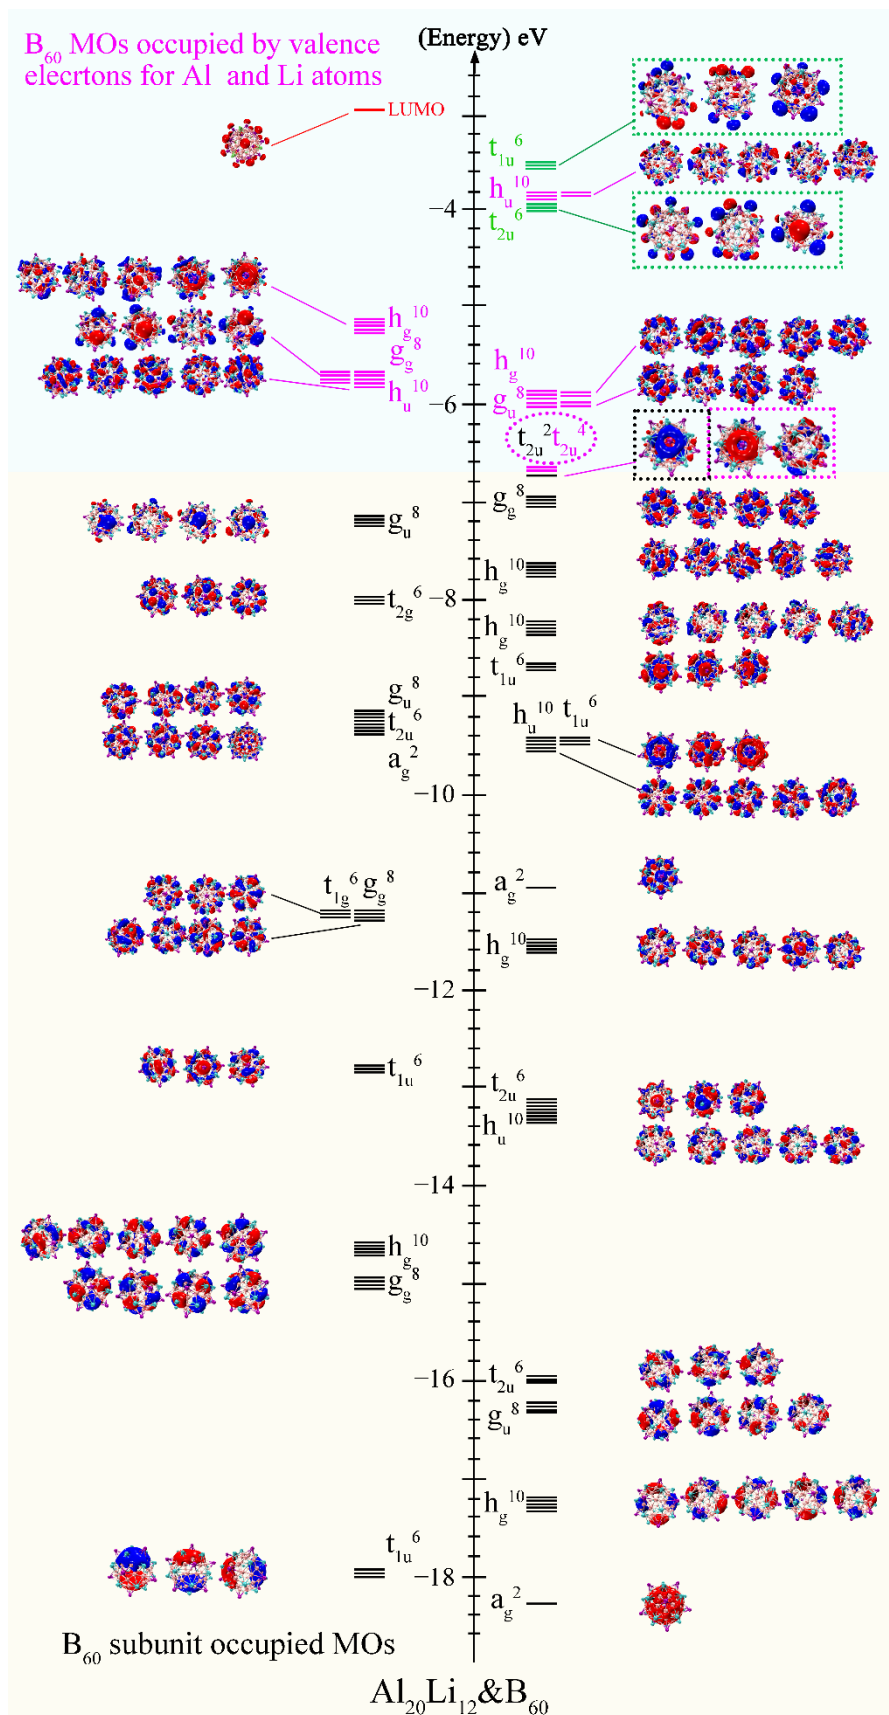

Figure S2. The complete molecular orbital energy diagram of Al<sub>20</sub>Li<sub>12</sub>&B<sub>60</sub>.

Table S2. The push electron oxidation effects of the super-reduced polyanionic state  $B_{60}^{50-}/B_{60}^{60-}$  cage with the powerfully strong negative electric fields are characterized as the energies ( $\Delta E$ ) of conversion between unoxidized  $Ca_6^0$  and oxidised  $Ca_6^{8+}/Ca_6^{10+}$  in  $B_{60}^{50-}$  and  $B_{60}^{60-}$  cages, respectively.<sup>a</sup>

| System                                                 | $V(B_{60})$ | $Ca_6^0$      | $Ca_6^{10+}$  | $Ca_6^{8+}$   | $\Delta E(\text{eV})$ |
|--------------------------------------------------------|-------------|---------------|---------------|---------------|-----------------------|
| $6e^- \& [(Al^{3+})_{12}(Li^+)_{20}] \& B_{60}^{50-}$  | -50         | -4063.93 a.u. | —             | -4058.57 a.u. | 145.97                |
| $12e^- \& [(Al^{3+})_{20}(Li^+)_{12}] \& B_{60}^{60-}$ | -60         | -4063.90 a.u. | -4055.35 a.u. | —             | 232.58                |

<sup>a</sup> For  $14e^- \& [(Al^{3+})_{12}(Li^+)_{20}] \& [(Ca_6)^{8+} @ B_{60}^{50-}]$ , the single point energies of the separately neutral  $Ca_6^0$  and  $Ca_6^{8+}$  cation were calculated, respectively. Energy difference between the  $Ca_6^0$  and  $Ca_6^{8+}$  is 145.97 eV. Similarly, for  $22e^- \& [(Al^{3+})_{20}(Li^+)_{12}] \& [(Ca_6)^{10+} @ B_{60}^{60-}]$ , the single point energy difference value between the neutral  $Ca_6^0$  and  $Ca_6^{10+}$  cation is 232.58 eV.

Table S3. The number of excess electron ( $N_{\{e\}}$ ), multiple ionization potentials ( $IP_n$ , in eV) for  $Al_{12}Li_{20} \& B_{60}$ ,  $Al_{20}Li_{12} \& B_{60}$  and  $Al_{12}Li_{20} \& (Ca_6 @ B_{60})$  as well as  $Al_{20}Li_{12} \& (Ca_6 @ B_{60})$ .

| System                                                                  | $N_{\{e\}}$ | $IP_1$    | $IP_2$    | $IP_3$    | $IP_4$    | $IP_5$    | $IP_6$    | $IP_7$    | $IP_8$    | $IP_9$    |
|-------------------------------------------------------------------------|-------------|-----------|-----------|-----------|-----------|-----------|-----------|-----------|-----------|-----------|
| $6e^- \& [(Al^{3+})_{12}(Li^+)_{20}] \& B_{60}^{50-}$                   | 6           | 4.63      | 7.04      | 8.74      | 10.98     | 13.22     | 15.44     |           |           |           |
| $12e^- \& [(Al^{3+})_{20}(Li^+)_{12}] \& B_{60}^{60-}$                  | 12          | 4.25      | 6.49      | 8.41      | 10.54     | 12.81     | 14.97     | 17.39     | 19.58     | 21.77     |
| $14e^- \& [(Al^{3+})_{12}(Li^+)_{20}] \& [(Ca_6)^{8+} @ B_{60}^{50-}]$  | 14          | 4.37      | 6.26      | 8.75      | 10.87     | 13.24     | 15.54     | 17.89     | 20.10     | 22.37     |
| $22e^- \& [(Al^{3+})_{20}(Li^+)_{12}] \& [(Ca_6)^{10+} @ B_{60}^{60-}]$ | 22          | 3.42      | 6.38      | 8.26      | 11.37     | 13.34     | 15.12     | 17.70     | 19.71     | 21.35     |
| System                                                                  | $N_{\{e\}}$ | $IP_{10}$ | $IP_{11}$ | $IP_{12}$ | $IP_{13}$ | $IP_{14}$ | $IP_{15}$ | $IP_{16}$ | $IP_{17}$ | $IP_{18}$ |
| $12e^- \& [(Al^{3+})_{20}(Li^+)_{12}] \& B_{60}^{60-}$                  | 12          | 24.16     | 26.32     | 28.65     |           |           |           |           |           |           |
| $14e^- \& [(Al^{3+})_{12}(Li^+)_{20}] \& [(Ca_6)^{8+} @ B_{60}^{50-}]$  | 14          | 24.67     | 26.70     | 29.24     | 31.67     | 34.08     |           |           |           |           |
| $22e^- \& [(Al^{3+})_{20}(Li^+)_{12}] \& [(Ca_6)^{10+} @ B_{60}^{60-}]$ | 22          | 23.89     | 25.94     | 28.73     | 30.33     | 33.27     | 35.00     | 37.61     | 39.82     | 42.14     |
| System                                                                  | $N_{\{e\}}$ | $IP_{19}$ | $IP_{20}$ | $IP_{21}$ | $IP_{22}$ |           |           |           |           |           |
| $22e^- \& [(Al^{3+})_{20}(Li^+)_{12}] \& [(Ca_6)^{10+} @ B_{60}^{60-}]$ | 22          | 44.38     | 46.79     | 49.06     | 51.40     |           |           |           |           |           |

### Electrostatic interaction calculation

The ionization potential of an atom can be estimated by the point charge model using Coulomb interaction potential formula as follows:

$$VIP = -k \frac{Qq}{r_q}$$

where k is the correction factor (0.663 for Na, 0.686 for Ti, 0.711 for S5)

$\text{Al}_{20}\text{Li}_{12}\&(\text{Ca}_6\text{@B}_{60})$ ), the  $Q$  and  $q$  denote the charge of nuclear charge (+1) and an electron (-1) for Na and Ti atoms, whereas  $Q$  denotes effective nuclear charge (+0.5) for  $\text{Al}_{20}\text{Li}_{12}\&(\text{Ca}_6\text{@B}_{60})$ . The  $r_q$  denotes the distance between nuclear charge to electron. For example, the estimative  $\text{VIP}_1$  values of Na and Ti are 5.14 and 6.83 eV, respectively. The estimative  $\text{VIP}_1$  value of  $\text{Al}_{20}\text{Li}_{12}\&(\text{Ca}_6\text{@B}_{60})$  is 3.42 eV.

## Cartesian Coordinates

### Al<sub>12</sub>Li<sub>20</sub>&B<sub>60</sub>

|   |             |             |             |
|---|-------------|-------------|-------------|
| B | 1.44632700  | -0.46994000 | -4.05212600 |
| B | 0.89387900  | 1.23031900  | -4.05212600 |
| B | -3.69400600 | -0.32050200 | 2.23249300  |
| B | -3.17690000 | -1.91199000 | 2.23249300  |
| B | -1.73057400 | -2.38193000 | 3.17237300  |
| B | 1.73057400  | 2.38193000  | -3.17237300 |
| B | -2.80012700 | 0.90981600  | 3.17237300  |
| B | -0.89387900 | -1.23031900 | 4.05212600  |
| B | 3.69400600  | 0.32050200  | -2.23249300 |
| B | -1.44632700 | 0.46994000  | 4.05212600  |
| B | 3.17690000  | 1.91199000  | -2.23249300 |
| B | 0.00000000  | 1.52075800  | 4.05212600  |
| B | 1.44632700  | -3.41416800 | -2.23249300 |
| B | 2.80012700  | -2.43057400 | -2.23249300 |
| B | 2.80012700  | -0.90981600 | -3.17237300 |
| B | 0.00000000  | 2.94422800  | 3.17237300  |
| B | 0.00000000  | -1.52075800 | -4.05212600 |
| B | 0.00000000  | -2.94422800 | -3.17237300 |
| B | -1.44632700 | -3.41416800 | -2.23249300 |
| B | -2.80012700 | 2.43057400  | 2.23249300  |
| B | -1.44632700 | -0.46994000 | -4.05212600 |
| B | -3.69400600 | 2.14013500  | 0.71173500  |
| B | -4.24645400 | 0.43987600  | 0.71173500  |
| B | -3.69400600 | -2.14013500 | -0.71173500 |
| B | -3.17690000 | -2.85187000 | 0.71173500  |
| B | -1.73057400 | -3.90268800 | 0.71173500  |
| B | 0.89387900  | -1.23031900 | 4.05212600  |
| B | 1.44632700  | 0.46994000  | 4.05212600  |
| B | 2.80012700  | 0.90981600  | 3.17237300  |
| B | 0.83669500  | -3.61224900 | 2.23249300  |
| B | -0.83669500 | -3.61224900 | 2.23249300  |
| B | -0.89387900 | 1.23031900  | -4.05212600 |
| B | -1.73057400 | 2.38193000  | -3.17237300 |
| B | -4.24645400 | -0.43987600 | -0.71173500 |
| B | -3.69400600 | 0.32050200  | -2.23249300 |
| B | -2.80012700 | -2.43057400 | -2.23249300 |
| B | -2.80012700 | -0.90981600 | -3.17237300 |
| B | -3.17690000 | 1.91199000  | -2.23249300 |
| B | -3.17690000 | 2.85187000  | -0.71173500 |
| B | -1.73057400 | 3.90268800  | -0.71173500 |
| B | -0.89387900 | 4.17454700  | 0.71173500  |

|    |             |             |             |
|----|-------------|-------------|-------------|
| B  | -1.44632700 | 3.41416800  | 2.23249300  |
| B  | -0.89387900 | -4.17454700 | -0.71173500 |
| B  | 0.89387900  | -4.17454700 | -0.71173500 |
| B  | -0.83669500 | 3.61224900  | -2.23249300 |
| B  | 0.83669500  | 3.61224900  | -2.23249300 |
| B  | 3.69400600  | -0.32050200 | 2.23249300  |
| B  | 1.73057400  | -2.38193000 | 3.17237300  |
| B  | 4.24645400  | -0.43987600 | -0.71173500 |
| B  | 1.73057400  | -3.90268800 | 0.71173500  |
| B  | 3.17690000  | -2.85187000 | 0.71173500  |
| B  | 3.69400600  | -2.14013500 | -0.71173500 |
| B  | 3.17690000  | 2.85187000  | -0.71173500 |
| B  | 4.24645400  | 0.43987600  | 0.71173500  |
| B  | 3.69400600  | 2.14013500  | 0.71173500  |
| B  | 1.73057400  | 3.90268800  | -0.71173500 |
| B  | 3.17690000  | -1.91199000 | 2.23249300  |
| B  | 0.89387900  | 4.17454700  | 0.71173500  |
| B  | 1.44632700  | 3.41416800  | 2.23249300  |
| B  | 2.80012700  | 2.43057400  | 2.23249300  |
| Li | -3.08126100 | -4.24099200 | -1.00116200 |
| Li | -1.90432400 | -2.62107700 | -4.24099200 |
| Li | 0.00000000  | -5.24215400 | 1.00116200  |
| Li | 1.90432400  | -2.62107700 | -4.24099200 |
| Li | 3.08126100  | -4.24099200 | -1.00116200 |
| Li | 0.00000000  | -3.23982900 | 4.24099200  |
| Li | -4.98558500 | -1.61991500 | 1.00116200  |
| Li | -3.08126100 | -1.00116200 | 4.24099200  |
| Li | -3.08126100 | 1.00116200  | -4.24099200 |
| Li | -4.98558500 | 1.61991500  | -1.00116200 |
| Li | -3.08126100 | 4.24099200  | 1.00116200  |
| Li | -1.90432400 | 2.62107700  | 4.24099200  |
| Li | 0.00000000  | 5.24215400  | -1.00116200 |
| Li | 0.00000000  | 3.23982900  | -4.24099200 |
| Li | 1.90432400  | 2.62107700  | 4.24099200  |
| Li | 3.08126100  | -1.00116200 | 4.24099200  |
| Li | 3.08126100  | 4.24099200  | 1.00116200  |
| Li | 4.98558500  | 1.61991500  | -1.00116200 |
| Li | 3.08126100  | 1.00116200  | -4.24099200 |
| Li | 4.98558500  | -1.61991500 | 1.00116200  |
| Al | 0.00000000  | 0.00000000  | -5.53570500 |
| Al | -4.70895200 | 1.53003100  | 2.47564300  |
| Al | -4.70895200 | -1.53003100 | -2.47564300 |
| Al | 0.00000000  | 0.00000000  | 5.53570500  |
| Al | -2.91029300 | -4.00567400 | 2.47564300  |



|    |             |             |             |
|----|-------------|-------------|-------------|
| Al | 0.00000000  | -4.95128500 | -2.47564300 |
| Al | 4.70895200  | -1.53003100 | -2.47564300 |
| Al | 4.70895200  | 1.53003100  | 2.47564300  |
| Al | -2.91029300 | 4.00567400  | -2.47564300 |
| Al | 2.91029300  | -4.00567400 | 2.47564300  |
| Al | 0.00000000  | 4.95128500  | 2.47564300  |
| Al | 2.91029300  | 4.00567400  | -2.47564300 |

---

**Al<sub>20</sub>Li<sub>12</sub>&B<sub>60</sub>**

|   |             |             |             |
|---|-------------|-------------|-------------|
| B | 0.85774609  | 1.18058622  | 4.00473420  |
| B | -0.85774609 | 1.18058622  | 4.00473420  |
| B | -0.86407526 | -3.55046579 | -2.19430508 |
| B | 0.86407316  | -3.55046710 | -2.19430378 |
| B | 1.72181736  | -2.36988309 | -3.09619239 |
| B | -1.72181658 | 2.36987750  | 3.09619710  |
| B | -1.72181991 | -2.36988179 | -3.09619196 |
| B | 0.85774609  | -1.18058622 | -4.00473420 |
| B | 0.86407049  | 3.55046400  | 2.19430986  |
| B | -0.85774609 | -1.18058622 | -4.00473420 |
| B | -0.86406960 | 3.55046419  | 2.19430989  |
| B | -1.38786233 | 0.45094381  | -4.00473420 |
| B | 3.64370430  | 0.27537475  | 2.19430989  |
| B | 3.10967946  | 1.91893358  | 2.19430986  |
| B | 1.72181737  | 2.36987830  | 3.09619605  |
| B | -2.78596358 | 0.90521147  | -3.09619239 |
| B | 1.38786233  | -0.45094381 | 4.00473420  |
| B | 2.78595802  | -0.90521246 | 3.09619710  |
| B | 2.78595916  | -2.36449782 | 2.19430850  |
| B | -3.10967969 | -1.91893867 | -2.19430508 |
| B | -0.00000000 | -1.45928482 | 4.00473420  |
| B | -3.10967931 | -2.82082331 | -0.73502286 |
| B | -1.72181864 | -3.82916311 | -0.73502286 |
| B | 0.85774549  | -4.10991713 | 0.73502518  |
| B | 1.72181983  | -3.82916329 | -0.73501916 |
| B | 3.10968078  | -2.82082184 | -0.73502232 |
| B | 1.38786233  | 0.45094381  | -4.00473420 |
| B | -0.00000000 | 1.45928482  | -4.00473420 |
| B | -0.00000154 | 2.92933159  | -3.09619519 |
| B | 3.64370815  | -0.27537487 | -2.19430348 |
| B | 3.10967924  | -1.91893613 | -2.19430794 |
| B | -1.38786233 | -0.45094381 | 4.00473420  |
| B | -2.78595843 | -0.90521215 | 3.09619683  |
| B | -0.85774609 | -4.10991725 | 0.73502380  |

|    |             |             |             |
|----|-------------|-------------|-------------|
| B  | -1.38786200 | -3.38027407 | 2.19430957  |
| B  | 1.38786117  | -3.38027484 | 2.19430890  |
| B  | 0.00000059  | -2.92932985 | 3.09619683  |
| B  | -2.78595873 | -2.36449733 | 2.19430957  |
| B  | -3.64370547 | -2.08579929 | 0.73502380  |
| B  | -4.17382140 | -0.45426981 | 0.73502518  |
| B  | -4.17382229 | 0.45427144  | -0.73501916 |
| B  | -3.64370817 | -0.27537227 | -2.19430378 |
| B  | 3.64370489  | -2.08579974 | 0.73502536  |
| B  | 4.17382134  | -0.45427136 | 0.73502458  |
| B  | -3.64370510 | 0.27537204  | 2.19430890  |
| B  | -3.10967978 | 1.91893460  | 2.19430850  |
| B  | 1.38786368  | 3.38027500  | -2.19430707 |
| B  | 2.78596037  | 0.90521178  | -3.09619519 |
| B  | 1.72181547  | 3.82916409  | 0.73502519  |
| B  | 4.17382268  | 0.45426958  | -0.73501806 |
| B  | 3.64370547  | 2.08580127  | -0.73501817 |
| B  | 3.10968122  | 2.82082060  | 0.73502519  |
| B  | -1.72181946 | 3.82916241  | 0.73502458  |
| B  | 0.85774798  | 4.10991787  | -0.73501817 |
| B  | -0.85774609 | 4.10991828  | -0.73501806 |
| B  | -3.10968017 | 2.82082171  | 0.73502536  |
| B  | 2.78595910  | 2.36449921  | -2.19430707 |
| B  | -3.64370520 | 2.08580028  | -0.73502232 |
| B  | -2.78596044 | 2.36449683  | -2.19430794 |
| B  | -1.38786480 | 3.38027687  | -2.19430348 |
| Al | 3.01676871  | -4.15222592 | 0.98020810  |
| Al | 1.86446784  | -2.56621387 | 4.15222681  |
| Al | 4.88123558  | -1.58600723 | -0.98020494 |
| Al | 3.01676444  | 0.98020751  | 4.15222916  |
| Al | 4.88123432  | 1.58600917  | 0.98020810  |
| Al | 3.01677183  | -0.98020511 | -4.15222436 |
| Al | -0.00000223 | -5.13243410 | -0.98020494 |
| Al | -0.00000516 | -3.17201452 | -4.15222896 |
| Al | -1.86446422 | -2.56621270 | 4.15222916  |
| Al | -3.01676872 | -4.15222592 | 0.98020810  |
| Al | -4.88123507 | -1.58600752 | -0.98020703 |
| Al | -3.01677148 | -0.98020747 | -4.15222406 |
| Al | -4.88123432 | 1.58600917  | 0.98020810  |
| Al | -3.01676988 | 0.98020698  | 4.15222534  |
| Al | -1.86446248 | 2.56621991  | -4.15222549 |
| Al | 1.86446635  | 2.56621940  | -4.15222406 |
| Al | -3.01676835 | 4.15222642  | -0.98020710 |
| Al | 0.00000000  | 5.13243349  | 0.98020810  |

|    |             |             |             |
|----|-------------|-------------|-------------|
| Al | 0.00000092  | 3.17201926  | 4.15222534  |
| Al | 3.01676737  | 4.15222714  | -0.98020703 |
| Li | 0.00000000  | 0.00000000  | 5.76913888  |
| Li | -3.03301477 | -4.17459236 | -2.58003169 |
| Li | 0.00000206  | -5.16007360 | 2.58003950  |
| Li | -0.00000000 | 0.00000000  | -5.76913888 |
| Li | 3.03301477  | -4.17459236 | -2.58003169 |
| Li | 4.90752099  | -1.59455239 | 2.58003950  |
| Li | 3.03301683  | 4.17458603  | 2.58003950  |
| Li | 0.00000333  | 5.16007751  | -2.58003169 |
| Li | -4.90752099 | -1.59455239 | 2.58003950  |
| Li | 4.90752637  | 1.59454848  | -2.58003169 |
| Li | -4.90752432 | 1.59455481  | -2.58003169 |
| Li | -3.03301350 | 4.17458845  | 2.58003950  |

**Al<sub>12</sub>Li<sub>20</sub>&(Ca<sub>6</sub>@B<sub>60</sub>)**

|   |             |             |             |
|---|-------------|-------------|-------------|
| B | 3.85148500  | 0.12187200  | 1.72176100  |
| B | 2.96456700  | 0.25433300  | 3.26912000  |
| B | -3.14369100 | 2.88829600  | -1.55149900 |
| B | -2.23535600 | 2.86840700  | -2.99692000 |
| B | -2.13398700 | 1.04812400  | -3.97113200 |
| B | 2.13398700  | -1.04812400 | 3.97113200  |
| B | -3.87825000 | 1.35984300  | -0.88795400 |
| B | -2.96456700 | -0.25433300 | -3.26912000 |
| B | 3.14369100  | -2.88829600 | 1.55149900  |
| B | -3.85148500 | -0.12187200 | -1.72176100 |
| B | 2.23535600  | -2.86840700 | 2.99692000  |
| B | -4.00899500 | -1.77051600 | -0.83518500 |
| B | 3.85148500  | 0.12187200  | -1.72176100 |
| B | 3.87825000  | -1.35984300 | -0.88795400 |
| B | 3.87825000  | -1.35984300 | 0.88795400  |
| B | -4.00899500 | -1.77051600 | 0.83518500  |
| B | 4.00899500  | 1.77051600  | 0.83518500  |
| B | 4.00899500  | 1.77051600  | -0.83518500 |
| B | 2.94261100  | 2.96449400  | -1.78719700 |
| B | -3.87825000 | 1.35984300  | 0.88795400  |
| B | 2.94261100  | 2.96449400  | 1.78719700  |
| B | -3.14369100 | 2.88829600  | 1.55149900  |
| B | -2.41320300 | 3.49764400  | 0.00000000  |
| B | 0.22581400  | 4.02871800  | -1.46227200 |
| B | -0.48423900 | 3.36659400  | -2.85198600 |
| B | 0.59060700  | 2.12051800  | -3.58678900 |
| B | -2.19059800 | -1.91576700 | -3.09021500 |
| B | -2.94261100 | -2.96449400 | -1.78719700 |

|    |             |             |             |
|----|-------------|-------------|-------------|
| B  | -1.95560100 | -4.07967700 | -0.97045100 |
| B  | 0.37999300  | -0.76278100 | -4.25091900 |
| B  | -0.37999300 | 0.76278100  | -4.25091900 |
| B  | 2.19059800  | 1.91576700  | 3.09021500  |
| B  | 0.59060700  | 2.12051800  | 3.58678900  |
| B  | -0.78048900 | 3.92849300  | 0.00000000  |
| B  | 0.22581400  | 4.02871800  | 1.46227200  |
| B  | 1.95560100  | 4.07967700  | -0.97045100 |
| B  | 1.95560100  | 4.07967700  | 0.97045100  |
| B  | -0.48423900 | 3.36659400  | 2.85198600  |
| B  | -2.23535600 | 2.86840700  | 2.99692000  |
| B  | -2.13398700 | 1.04812400  | 3.97113200  |
| B  | -2.96456700 | -0.25433300 | 3.26912000  |
| B  | -3.85148500 | -0.12187200 | 1.72176100  |
| B  | 2.19059800  | 1.91576700  | -3.09021500 |
| B  | 2.96456700  | 0.25433300  | -3.26912000 |
| B  | -0.37999300 | 0.76278100  | 4.25091900  |
| B  | 0.37999300  | -0.76278100 | 4.25091900  |
| B  | -0.22581400 | -4.02871800 | -1.46227200 |
| B  | -0.59060700 | -2.12051800 | -3.58678900 |
| B  | 2.41320300  | -3.49764400 | 0.00000000  |
| B  | 2.13398700  | -1.04812400 | -3.97113200 |
| B  | 2.23535600  | -2.86840700 | -2.99692000 |
| B  | 3.14369100  | -2.88829600 | -1.55149900 |
| B  | 0.48423900  | -3.36659400 | 2.85198600  |
| B  | 0.78048900  | -3.92849300 | 0.00000000  |
| B  | -0.22581400 | -4.02871800 | 1.46227200  |
| B  | -0.59060700 | -2.12051800 | 3.58678900  |
| B  | 0.48423900  | -3.36659400 | -2.85198600 |
| B  | -2.19059800 | -1.91576700 | 3.09021500  |
| B  | -2.94261100 | -2.96449400 | 1.78719700  |
| B  | -1.95560100 | -4.07967700 | 0.97045100  |
| Li | 1.62323300  | 4.11805200  | -3.16837700 |
| Li | 3.98003600  | 3.86038600  | 0.00000000  |
| Li | 1.73978000  | 0.84540800  | -5.04003000 |
| Li | 5.29835100  | 0.19152700  | 0.00000000  |
| Li | 4.12740400  | -1.65743900 | -3.12891800 |
| Li | -1.73978000 | -0.84540800 | -5.04003000 |
| Li | -1.88626800 | 4.73985100  | -1.81380700 |
| Li | -4.12740400 | 1.65743900  | -3.12891800 |
| Li | 1.62323300  | 4.11805200  | 3.16837700  |
| Li | -1.88626800 | 4.73985100  | 1.81380700  |
| Li | -4.12740400 | 1.65743900  | 3.12891800  |
| Li | -5.29835100 | -0.19152700 | 0.00000000  |

|    |             |             |             |
|----|-------------|-------------|-------------|
| Li | -1.73978000 | -0.84540800 | 5.04003000  |
| Li | 1.73978000  | 0.84540800  | 5.04003000  |
| Li | -3.98003600 | -3.86038600 | 0.00000000  |
| Li | -1.62323300 | -4.11805200 | -3.16837700 |
| Li | -1.62323300 | -4.11805200 | 3.16837700  |
| Li | 1.88626800  | -4.73985100 | 1.81380700  |
| Li | 4.12740400  | -1.65743900 | 3.12891800  |
| Li | 1.88626800  | -4.73985100 | -1.81380700 |
| Al | 4.35184500  | 1.83723500  | 2.92250200  |
| Al | -4.57015300 | 3.24495600  | 0.00000000  |
| Al | 0.71811400  | 5.57234900  | 0.00000000  |
| Al | -4.35184500 | -1.83723500 | -2.92250200 |
| Al | -1.09886200 | 2.70443500  | -4.76593200 |
| Al | 4.35184500  | 1.83723500  | -2.92250200 |
| Al | 4.57015300  | -3.24495600 | 0.00000000  |
| Al | -0.71811400 | -5.57234900 | 0.00000000  |
| Al | -1.09886200 | 2.70443500  | 4.76593200  |
| Al | 1.09886200  | -2.70443500 | -4.76593200 |
| Al | -4.35184500 | -1.83723500 | 2.92250200  |
| Al | 1.09886200  | -2.70443500 | 4.76593200  |
| Ca | 1.21414600  | -1.09756700 | -1.63124300 |
| Ca | -1.21414600 | 1.09756700  | 1.63124300  |
| Ca | 1.48932000  | 1.77999200  | 0.00000000  |
| Ca | -1.48932000 | -1.77999200 | 0.00000000  |
| Ca | 1.21414600  | -1.09756700 | 1.63124300  |
| Ca | -1.21414600 | 1.09756700  | -1.63124300 |

---

**Al<sub>20</sub>Li<sub>12</sub>&(Ca<sub>6</sub>@B<sub>60</sub>)**

|   |             |             |             |
|---|-------------|-------------|-------------|
| B | -3.74245600 | -1.74144000 | 1.37066000  |
| B | -2.69556200 | -3.07290500 | 0.83990800  |
| B | 1.74144000  | 1.37066000  | -3.74245600 |
| B | 0.83990800  | 2.69556200  | -3.07290500 |
| B | 1.37066000  | 3.74245600  | -1.74144000 |
| B | -1.37066000 | -3.74245600 | 1.74144000  |
| B | 3.07290500  | 0.83990800  | -2.69556200 |
| B | 2.69556200  | 3.07290500  | -0.83990800 |
| B | -1.74144000 | -1.37066000 | 3.74245600  |
| B | 3.74245600  | 1.74144000  | -1.37066000 |
| B | -0.83990800 | -2.69556200 | 3.07290500  |
| B | 4.52482800  | 0.93578300  | 0.00000000  |
| B | -3.74245600 | 1.74144000  | 1.37066000  |
| B | -3.07290500 | 0.83990800  | 2.69556200  |
| B | -3.07290500 | -0.83990800 | 2.69556200  |
| B | 4.52482800  | -0.93578300 | 0.00000000  |

|   |             |             |             |
|---|-------------|-------------|-------------|
| B | -4.52482800 | -0.93578300 | 0.00000000  |
| B | -4.52482800 | 0.93578300  | 0.00000000  |
| B | -3.74245600 | 1.74144000  | -1.37066000 |
| B | 3.07290500  | -0.83990800 | -2.69556200 |
| B | -3.74245600 | -1.74144000 | -1.37066000 |
| B | 1.74144000  | -1.37066000 | -3.74245600 |
| B | 0.93578300  | 0.00000000  | -4.52482800 |
| B | -1.74144000 | 1.37066000  | -3.74245600 |
| B | -0.83990800 | 2.69556200  | -3.07290500 |
| B | -1.37066000 | 3.74245600  | -1.74144000 |
| B | 2.69556200  | 3.07290500  | 0.83990800  |
| B | 3.74245600  | 1.74144000  | 1.37066000  |
| B | 3.07290500  | 0.83990800  | 2.69556200  |
| B | 0.00000000  | 4.52482800  | 0.93578300  |
| B | 0.00000000  | 4.52482800  | -0.93578300 |
| B | -2.69556200 | -3.07290500 | -0.83990800 |
| B | -1.37066000 | -3.74245600 | -1.74144000 |
| B | -0.93578300 | 0.00000000  | -4.52482800 |
| B | -1.74144000 | -1.37066000 | -3.74245600 |
| B | -3.07290500 | 0.83990800  | -2.69556200 |
| B | -3.07290500 | -0.83990800 | -2.69556200 |
| B | -0.83990800 | -2.69556200 | -3.07290500 |
| B | 0.83990800  | -2.69556200 | -3.07290500 |
| B | 1.37066000  | -3.74245600 | -1.74144000 |
| B | 2.69556200  | -3.07290500 | -0.83990800 |
| B | 3.74245600  | -1.74144000 | -1.37066000 |
| B | -2.69556200 | 3.07290500  | -0.83990800 |
| B | -2.69556200 | 3.07290500  | 0.83990800  |
| B | 0.00000000  | -4.52482800 | -0.93578300 |
| B | 0.00000000  | -4.52482800 | 0.93578300  |
| B | 1.74144000  | 1.37066000  | 3.74245600  |
| B | 1.37066000  | 3.74245600  | 1.74144000  |
| B | -0.93578300 | 0.00000000  | 4.52482800  |
| B | -1.37066000 | 3.74245600  | 1.74144000  |
| B | -0.83990800 | 2.69556200  | 3.07290500  |
| B | -1.74144000 | 1.37066000  | 3.74245600  |
| B | 0.83990800  | -2.69556200 | 3.07290500  |
| B | 0.93578300  | 0.00000000  | 4.52482800  |
| B | 1.74144000  | -1.37066000 | 3.74245600  |
| B | 1.37066000  | -3.74245600 | 1.74144000  |
| B | 0.83990800  | 2.69556200  | 3.07290500  |
| B | 2.69556200  | -3.07290500 | 0.83990800  |
| B | 3.74245600  | -1.74144000 | 1.37066000  |
| B | 3.07290500  | -0.83990800 | 2.69556200  |

|    |             |             |             |
|----|-------------|-------------|-------------|
| Al | -3.03564000 | 3.03564000  | -3.03564000 |
| Al | -5.07740000 | 0.00000000  | -1.99184700 |
| Al | -1.99184700 | 5.07740000  | 0.00000000  |
| Al | -5.07740000 | 0.00000000  | 1.99184700  |
| Al | -3.03564000 | 3.03564000  | 3.03564000  |
| Al | 1.99184700  | 5.07740000  | 0.00000000  |
| Al | 0.00000000  | 1.99184700  | -5.07740000 |
| Al | 3.03564000  | 3.03564000  | -3.03564000 |
| Al | -3.03564000 | -3.03564000 | -3.03564000 |
| Al | 0.00000000  | -1.99184700 | -5.07740000 |
| Al | 3.03564000  | -3.03564000 | -3.03564000 |
| Al | 5.07740000  | 0.00000000  | -1.99184700 |
| Al | 1.99184700  | -5.07740000 | 0.00000000  |
| Al | -1.99184700 | -5.07740000 | 0.00000000  |
| Al | 5.07740000  | 0.00000000  | 1.99184700  |
| Al | 3.03564000  | 3.03564000  | 3.03564000  |
| Al | 3.03564000  | -3.03564000 | 3.03564000  |
| Al | 0.00000000  | -1.99184700 | 5.07740000  |
| Al | -3.03564000 | -3.03564000 | 3.03564000  |
| Al | 0.00000000  | 1.99184700  | 5.07740000  |
| Li | -4.83520400 | -3.21277400 | 0.00000000  |
| Li | 3.21277400  | 0.00000000  | -4.83520400 |
| Li | -3.21277400 | 0.00000000  | -4.83520400 |
| Li | 4.83520400  | 3.21277400  | 0.00000000  |
| Li | 0.00000000  | 4.83520400  | -3.21277400 |
| Li | -4.83520400 | 3.21277400  | 0.00000000  |
| Li | -3.21277400 | 0.00000000  | 4.83520400  |
| Li | 3.21277400  | 0.00000000  | 4.83520400  |
| Li | 0.00000000  | -4.83520400 | -3.21277400 |
| Li | 0.00000000  | 4.83520400  | 3.21277400  |
| Li | 4.83520400  | -3.21277400 | 0.00000000  |
| Li | 0.00000000  | -4.83520400 | 3.21277400  |
| Ca | 0.00000000  | 0.00000000  | 2.26090400  |
| Ca | 0.00000000  | 0.00000000  | -2.26090400 |
| Ca | 0.00000000  | 2.26090400  | 0.00000000  |
| Ca | 0.00000000  | -2.26090400 | 0.00000000  |
| Ca | 2.26090400  | 0.00000000  | 0.00000000  |
| Ca | -2.26090400 | 0.00000000  | 0.00000000  |
